# Supplementary material for: Prediction of crucial epigenetically-associated, differentially expressed genes by integrated bioinformatics analysis and the identification of S100A9 as a novel biomarker in psoriasis
Source: PubMed Central journal article supplement — Int J Mol Med. 2019 Oct 31;45(1):93–102. doi: 10.3892/ijmm.2019.4392 (PMC6889933; doi:10.3892/ijmm.2019.4392), 2019-10-31
Supplement: Supplementary_Data.pdf [file Supplementary_Data.pdf]

Figure S1. Identification of DEGs in GSE14905 and GSE78097. Principal component analysis of the samples in (A) GSE14905 and (C) GSE78097. Orange dots represent normal samples and gray dots represent psoriasis samples. Hierarchical cluster analysis of DEGs in (B) GSE14905 and (D) GSE78097. The orange area represents normal samples and the gray area represents psoriasis samples. A  $|\log_2FC| > 1$  and  $P < 0.05$  were set as the cut-off criteria. DEGs, differently expressed genes.

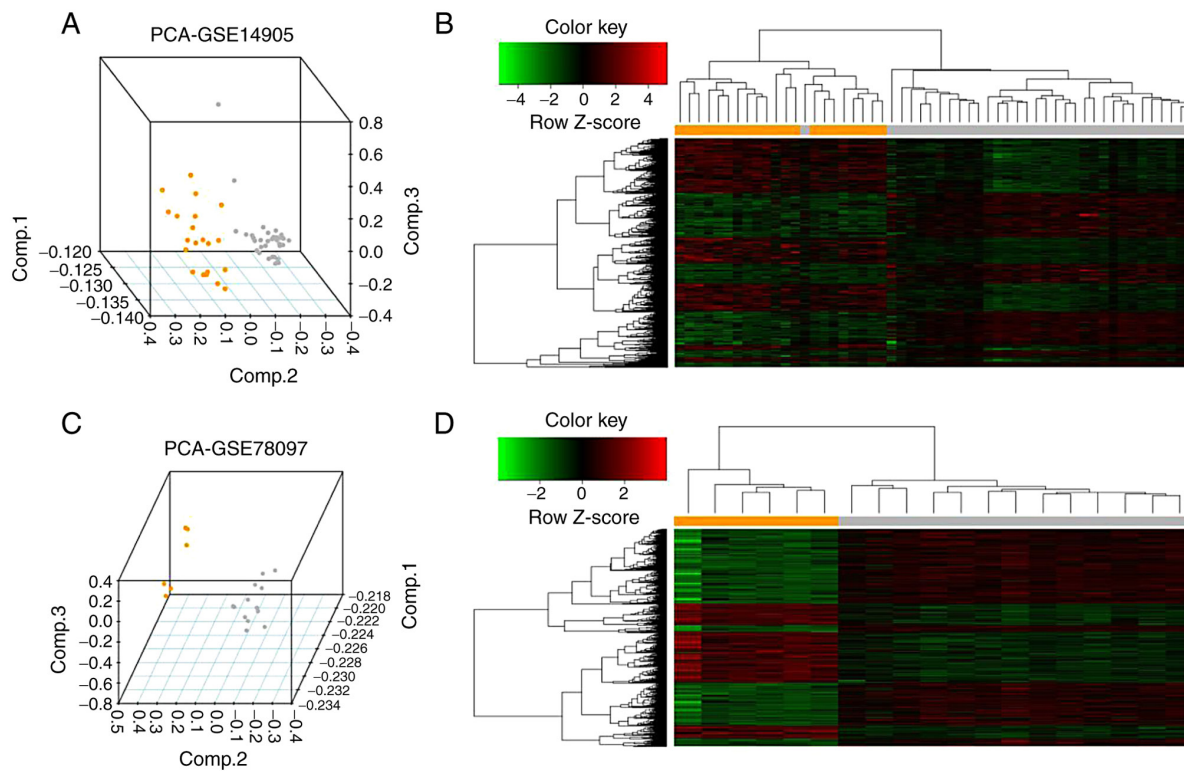

Figure S2. DEGs PPI network. The protein network was established by the Cytoscape software, including 475 nodes and 2556 edges. Blue nodes represent upregulated genes, and orange nodes represent downregulated genes. A combined score of  $>0.4$  was set as the cut-off criteria. DEGs, differently expressed genes; PPI, protein-protein interaction.

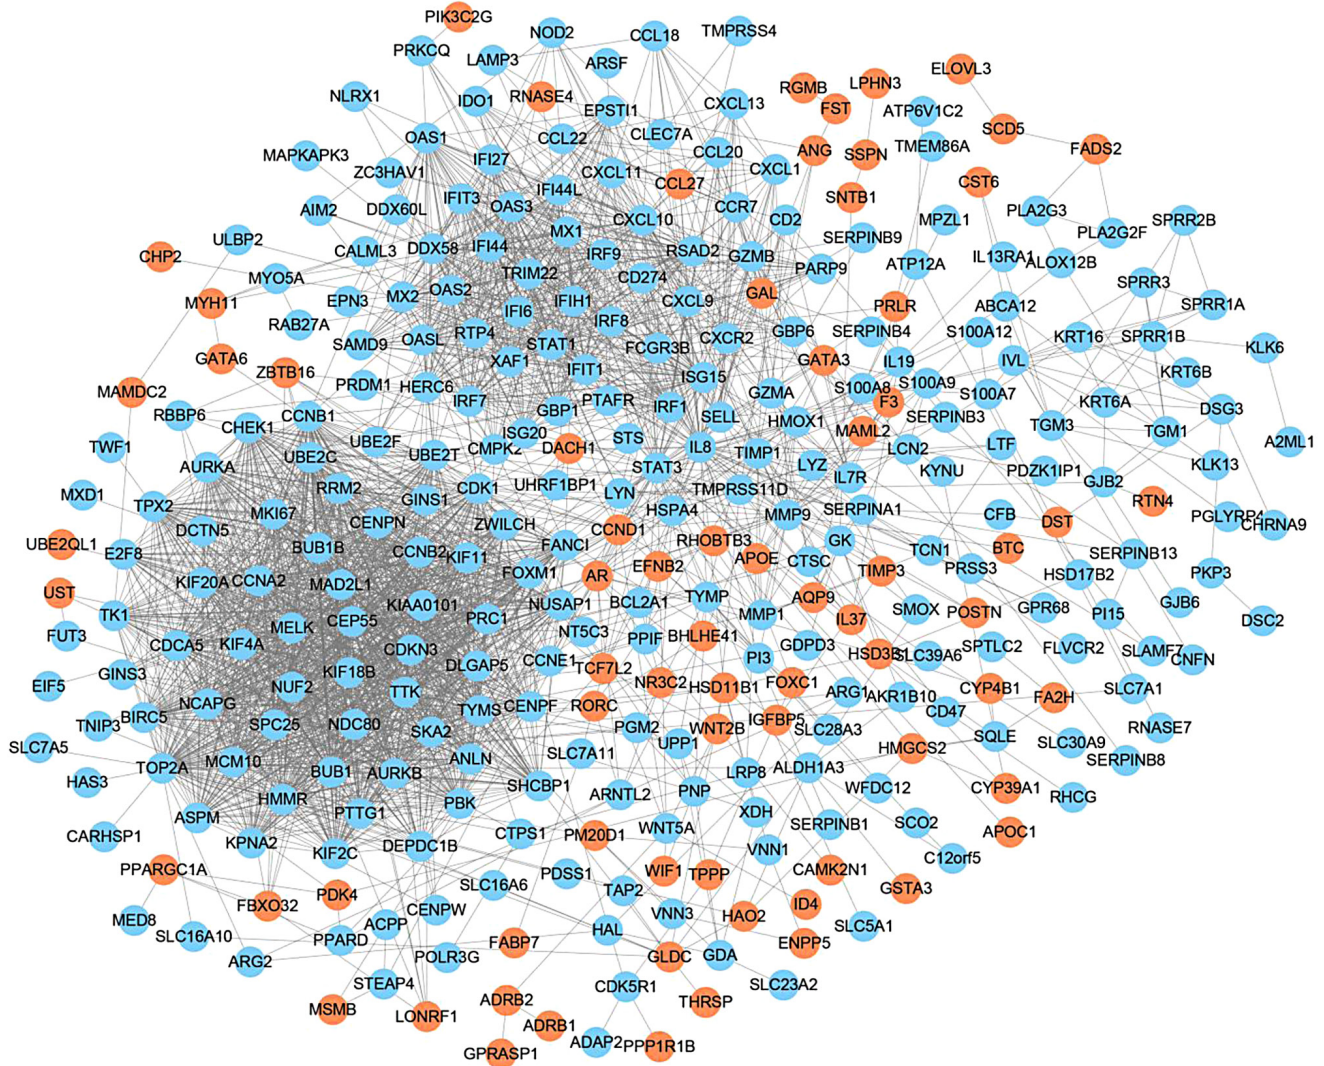

Figure S3. KEGG pathway analysis of Module 1 and Module 2 in the DEGs PPI network. The pathways involved in (A) module 1 and (B) module 2 were analyzed using ClueGO software in Cytoscape. KEGG, the Kyoto Encyclopedia of Genes and Genomes; DEGs, differentially expressed genes; PPI, protein-protein interaction.

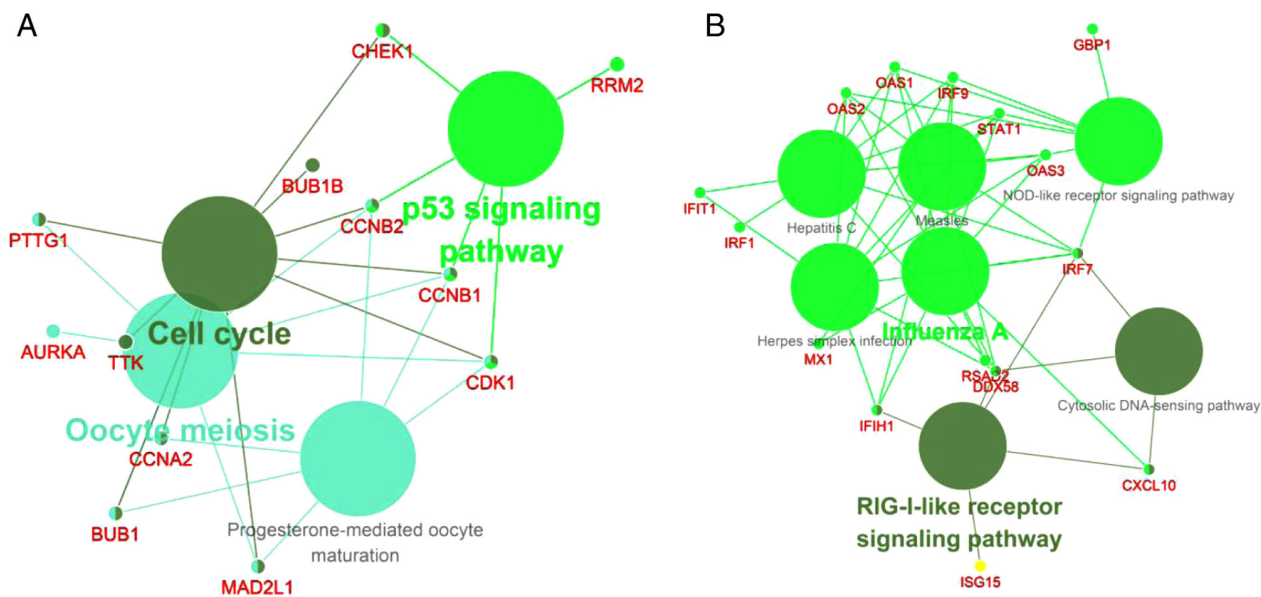

Figure S4. Biological process analysis of methylated-differentially expressed genes using ClueGO software. The significant enriched signaling pathways ( $P < 0.05$ ) are shown.

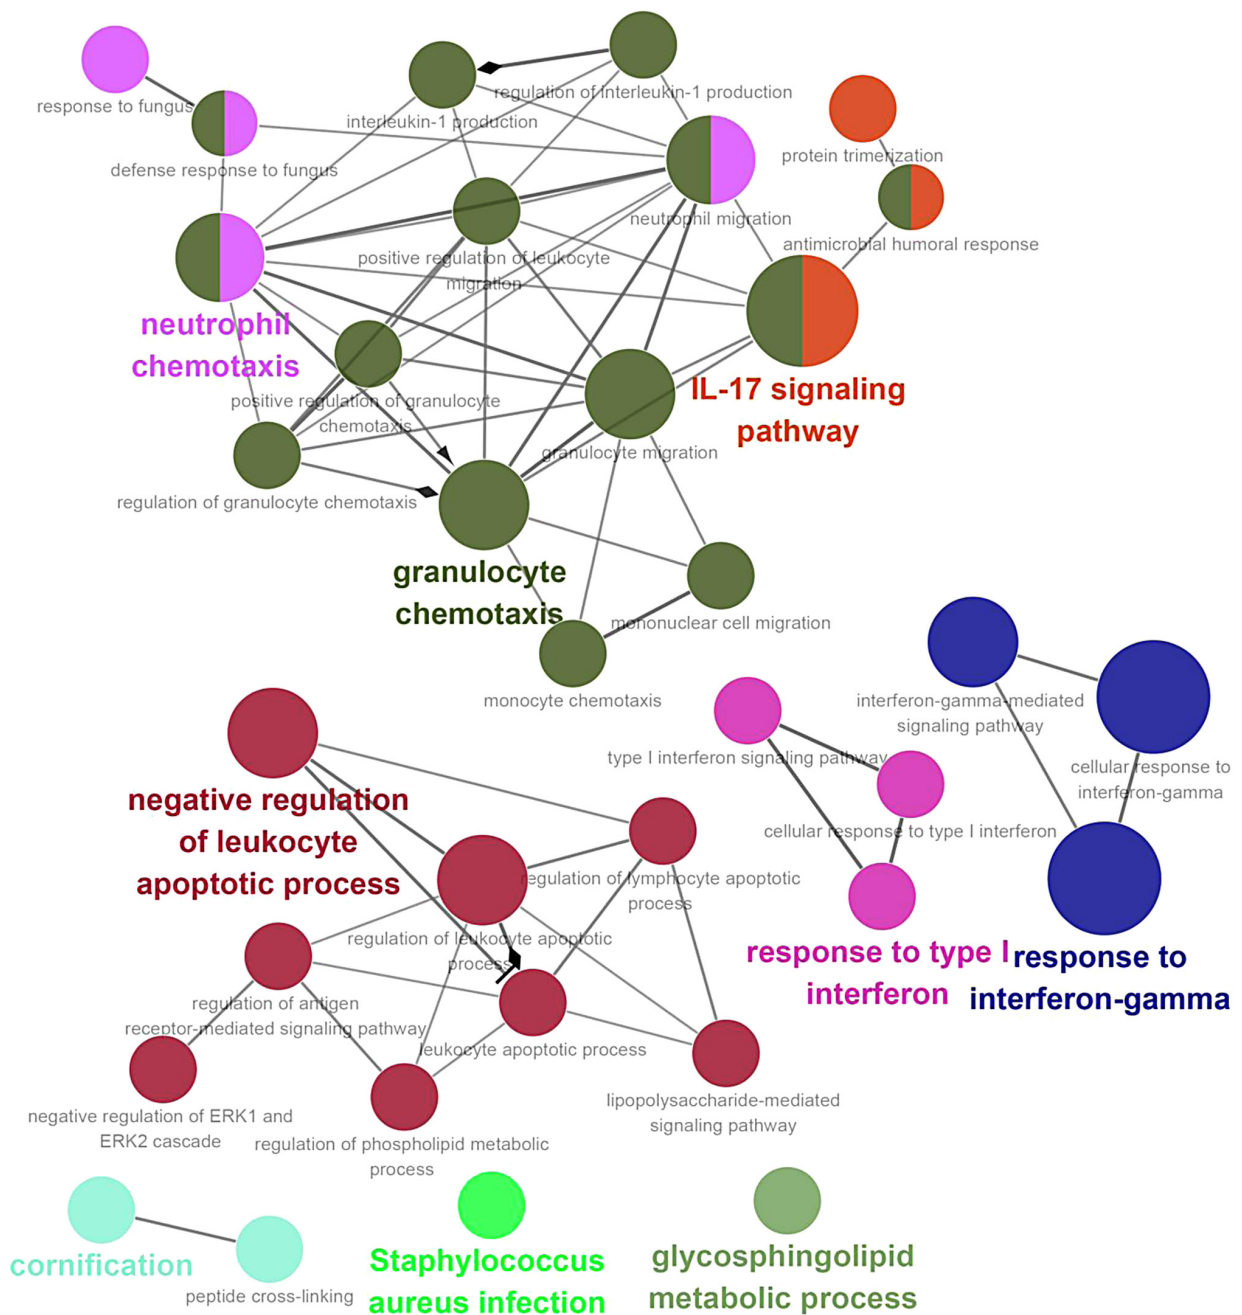

Figure S5. TET2 regulates the expression of partial hub genes in a model of psoriasiform dermatitis. (A-J) SELL, MMP9, IL7R, CXCL1, LCN2, FCGR3B, S100A7, IRF7, CCR7 and IFI44 mRNA levels in the skin lesions were evaluated using PCR. The results are presented as the means  $\pm$  standard deviation. All experiments were performed 3 times, and the representative results are presented. \* $P < 0.05$  and \*\* $P < 0.01$ ; ns, not significant.

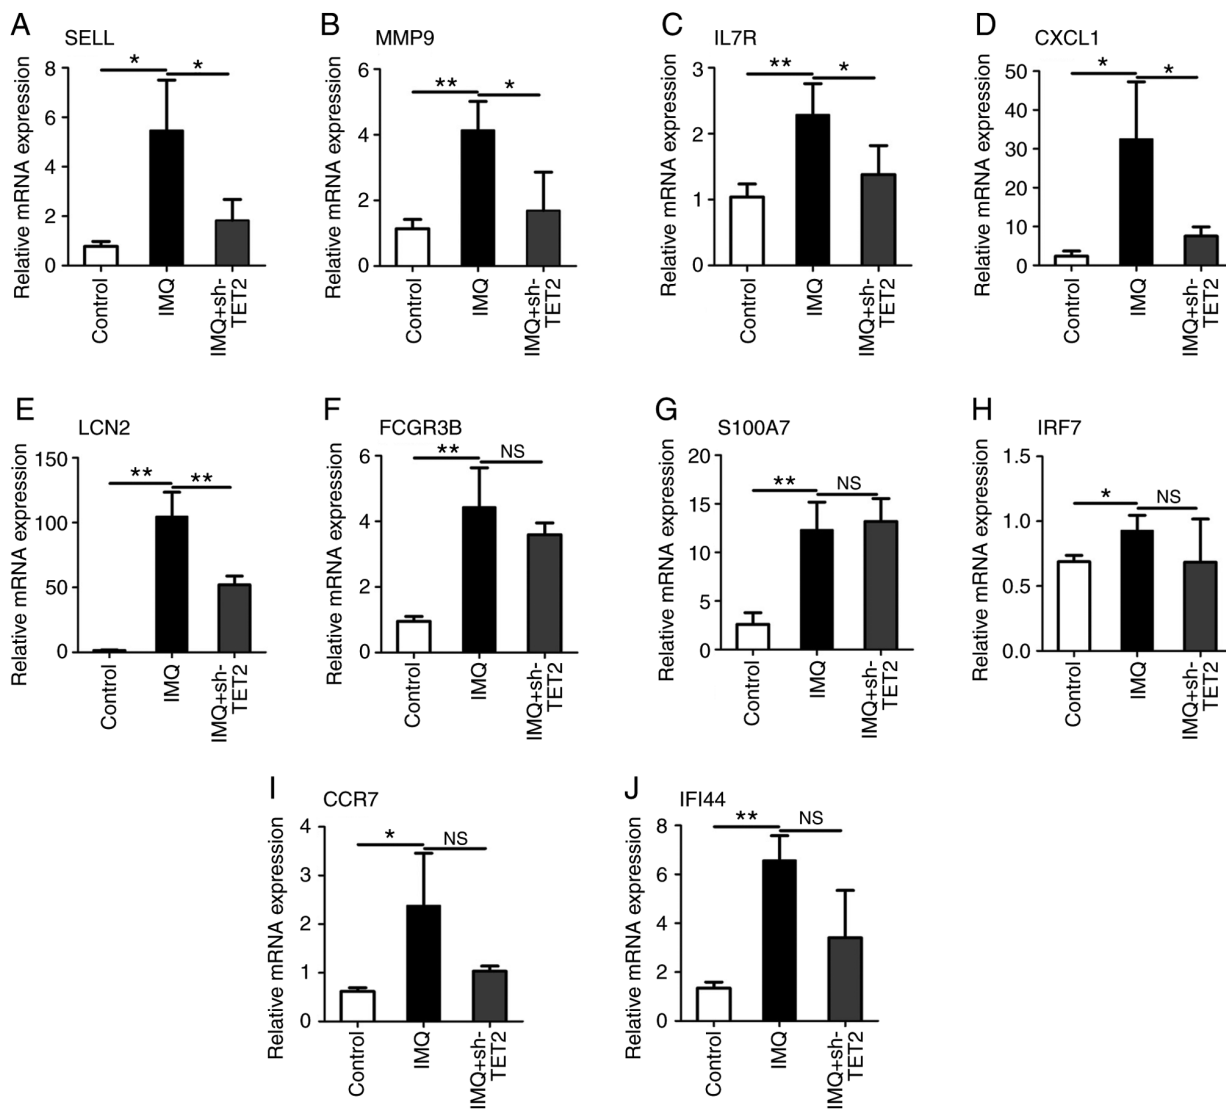

Table SI. Primers for used for RT-qPCR.

| Gene name  | Primer sequence (5'-3') |
|------------|-------------------------|
| Mus-GAPDH  |                         |
| Forward    | TGGCCTTCCGTGTTCCCTAC    |
| Reverse    | GAGTTGCTGTTGAAGTCGCA    |
| Mus-SELL   |                         |
| Forward    | TACATTGCCCAAAGCCCTTAT   |
| Reverse    | CCTCCTTGGACTTCTTGTTGTT  |
| Mus-MMP9   |                         |
| Forward    | CTGGACAGCCAGACACTAAAG   |
| Reverse    | CTCGCGCAAGTCTTCAGAG     |
| Mus-IL-7R  |                         |
| Forward    | GCGGACGATCACTCCTTCTG    |
| Reverse    | GCATTTCACTCGTAAAAGAGCCC |
| Mus-S100A7 |                         |
| Forward    | TGCTCTTGGATAGTGTGCCTC   |
| Reverse    | GCTCTGTGATGTAGTATGGCTG  |
| Mus-IRF7   |                         |
| Forward    | CCCCAGCCGGTGATCTTTC     |
| Reverse    | CACAGTGACGGTCCTCGAAG    |
| Mus-CCR7   |                         |
| Forward    | TGTACGAGTCGGTGTGCTTC    |
| Reverse    | GGTAGGTATCCGTCATGGTCTTG |
| Mus-IFI44  |                         |
| Forward    | AACTGACTGCTCGCAATAATGT  |
| Reverse    | GTAACACAGCAATGCCTCTTGT  |
| Mus-CXCL1  |                         |
| Forward    | ACTGCACCCAAACCGAAGTC    |
| Reverse    | TGGGGACACCTTTTAGCATCTT  |
| Mus-LCN2   |                         |
| Forward    | GCAGGTGGTACGTTGTGGG     |
| Reverse    | CTCTTGTAGTCATAGATGGTGC  |
| Mus-FCGR3  |                         |
| Forward    | CAGAATGCACACTCTGGAAGC   |
| Reverse    | GGGTCCCTTCGCACATCAG     |
| Mus-S100A9 |                         |
| Forward    | ATACTCTAGGAAGGAAGGACACC |
| Reverse    | TCCATGATGTCATTTATGAGGGC |
| Mus-TET2   |                         |
| Forward    | AGAGAAGACAATCGAGAAGTCGG |
| Reverse    | CCTTCCGTACTCCCAAACATCAT |

Table SII. Total of 352 consistently upregulated DEGs and 137 consistently downregulated DEGs in psoriasis samples compared to normal samples.

| DEGs          | Gene name                                                                                                                                                                                                                                                                                                                                                                                                                                                                                                                                                                                                                                                                                                                                                                                                                                                                                                                                                                                                                                                                                                                                                                                                                                                                                                                                                                                                                                                                                                                                                                                                                                                                                                                                                                                                                                                                                                                                                                                                                                                                                                                                                                                                                                                                                                                                                                                                                                                                                                                                                                                                                                                                    |
|---------------|------------------------------------------------------------------------------------------------------------------------------------------------------------------------------------------------------------------------------------------------------------------------------------------------------------------------------------------------------------------------------------------------------------------------------------------------------------------------------------------------------------------------------------------------------------------------------------------------------------------------------------------------------------------------------------------------------------------------------------------------------------------------------------------------------------------------------------------------------------------------------------------------------------------------------------------------------------------------------------------------------------------------------------------------------------------------------------------------------------------------------------------------------------------------------------------------------------------------------------------------------------------------------------------------------------------------------------------------------------------------------------------------------------------------------------------------------------------------------------------------------------------------------------------------------------------------------------------------------------------------------------------------------------------------------------------------------------------------------------------------------------------------------------------------------------------------------------------------------------------------------------------------------------------------------------------------------------------------------------------------------------------------------------------------------------------------------------------------------------------------------------------------------------------------------------------------------------------------------------------------------------------------------------------------------------------------------------------------------------------------------------------------------------------------------------------------------------------------------------------------------------------------------------------------------------------------------------------------------------------------------------------------------------------------------|
| Upregulated   | PPARD, IL7R, LYNX1, ZC3HAV1, AURKB, SLC30A9, TNIP3, E2F8, PGM2, CARHSP1, CXCL10, TGM1, XDH, PLCXD1, PDZK1IP1, TK1, IL19, IL36RN, ZDHHC21, ARG2, CARD6, MKI67, STEAP4, STS, ADAP2, HSD17B2, MPZL2, IDO1, ALDH1A3, HAS3, EHF, SCO2, OAS3, PTAFR, ARSF, KLK6, ATP6V1C2, HMOX1, PLA2G3, TPX2, SLC28A3, MOXD1, OAS1, RSAD2, DEPDC1B, SERPINB8, TMEM45B, MX1, SDR9C7, PLA2G2F, ATP11B, CCNB1, PDSS1, SHCBP1, DDX60L, SPRR2C, RGS20, NETO2, KCNK6, GDA, IRF1, CCL18, ASPM, NT5C3A, SMOX, CRABP2, KLK10, PI15, GK, HMMR, SLC7A1, CD24, CXCL13, PRKCQ, KIF4A, TRIM22, POLR3G, GBAP1, GINS3, LYZ, ATP12A, IRF7, SPRR3, SERPINB13, CCL22, DUOXA1, CMPK2, AKR1B10, LYN, AFAP1L2, DDX58, CFB, LRG1, GINS1, TMPRSS4, C12orf56, IFI6, SLC23A2, ZBED2, PRSS2, GM2A, KYNU, HERC6, TCN1, STAT3, TMEM86A, UPP1, CCL20, SLC5A1, XAF1, MPZL1, EPN3, CD47, LOC100996579, KPNA2, SPIN4, IL13RA1, MXD1, WNT5A, IFIH1, INA, ADAMDEC1, SLC16A6, RAB27A, WFDC12, ANLN, FBXO45, EIF5, SLC7A5, ARG1, UBE2F, KIF2C, PON2, GZMA, BIRC5, KIF20A, SQLE, APOL6, GJB6, SELL, MYO5A, CD2, TAP2, MCM10, AIM2, IRF8, GALNT6, KLK13, UBE2C, CHRNA9, FOXE1, FAM65C, TGM3, SERPINB9, SPRR2G, CCNE1, S100A7, MAPKAPK3, C12orf5, A2ML1, LCE3D, SPTLC2, FOXM1, HPSE, CHI3L2, SERPINB4, JMY, CCNB2, GK3P, TTC39A, VNN1, PRC1, SAMD9, S100A7A, SERPINB1, LCN2, KRT6B, IFI44L, RNASE7, TRBC1, PKP3, CNFN, CDK1, GPD3, FUT3, CLEC7A, TYMS, SFT2D2, CALML3, IFIT1, LAMP3, CLCA2, DNASE1L3, CHEK1, MELK, NOD2, LRP8, CENPW, GPR68, CTA-384D8.35, KIF11, GBP1, S100A12, NFE2L3, CEP55, EPSTI1, MPHOSPH6, PRSS27, SAMSN1, CEMIP, TWF1, CENPN, DCTN5, TMC5, IL36A, OAS2, PRSS3, IL36G, ULBP2, KIF18B, UHRF1, ACPP, KRT16, RRM2, RAET1E, TMPRSS11D, LAD1, CTPS1, SLC7A11, NDC80, SERPINB3, TOP2A, KIAA0101, SYNCRIP, MFHAS1, PPIF, CXCR2, GJB2, TMEM40, RHCG, PCP4L1, UNC93A, SPRR1A, PGLYRP4, CXCL9, MED8, ESYT3, KCNJ15, FANCI, IRF9, PARP9, GBP6, KLHDC7B, CCNA2, PLBD1, GZMB, HYAL4, VSNL1, TNFRSF21, FCGR3B, TTK, KLHL18, PRSS53, OTUB2, S100A8, SMPD3, ERO1L, IVL, ABCA12, CDKN3, LTF, PI3, BUB1, SLC6A14, NUF2, PBK, HAL, KRT78, NCAPG, LOC101928100, ISG20, RALGPS2, CXCL1, CD274, KRT6A, SPC25, OASL, HSPA4, CDK5R1, PRR11, ZWILCH, DSC2, CXCL11, MMP1, SLC26A9, SERPINA1, STAT1, TYMP, FAM26F, PTTG1, RP11-295G20.2, SKA2, APOBEC3B, MMP12, FAM43A, FLVCR2, CDCA5, SPRR2B, LYPD5, CXCL8, RTP4, AURKA, WDR66, UBE2T, IFI44, CENPF, NUSAP1, CCR7, SLC16A10, CHAC1, FCHSD1, BCL2A1, C10orf99, NLRX1, C12orf29, PRDM1, DSG3, BUB1B, SPRR1B, SH3PXD2A-AS1, ALOX12B, SLAMF7, DHRS9, ISG15, MAD2L1, MX2, PNP, LRRC8B, ST6GALNAC1, IFIT3, S100A9, DLGAP5, CYSRT1, MMP9, IGFL1, RBBP6, FAM83A, IFI27, SLC39A6, ARNTL2, CTSC, VNN3 |
| Downregulated | WIF1, FOXC1, PEG3, FIBIN, GREM2, PPP1R1B, NR3C2, RP11-757F18.5, PPARGC1A, RTN4, F3, ZSCAN18, PRELP, RGMB, RBMS3, CYP39A1, PAMR1, HAO2, MUC7, ADRB1, ZNF677, ANG, HMGCS2, FAM134B, LONRF1, C2orf88, ADRB2, BCAR3, TMEM47, FGF2, EDIL3, CRAT, CHL1, FA2H, PLLP, CST6, AHNAK2, COBL, MACROD2, CLDN23, MAMDC2, WDR72, CAMK2N1, AQP9, C11orf80, THRSP, FST, EFNB2, FXVD6, ARHGEF26, FABP7, RAI14, KRT77, SERPINA12, GATA3, CHP2, PM20D1, RAI2, ZBTB16, TCF7L2, OGN, FBXO32, SSPN, PWAR6, SCARA5, AR, LAMB4, TMEM56, SCGB2A1, HSD3B1, BHLHE41, WNT2B, ZNF667-AS1, KIAA1244, GAL, RHOBTB3, COCH, C5orf46, RNF128, SVIP, SLITRK6, SCD5, GSTA3, BTC, MFSD4, TIMP3, GLDC, PDK4, MAML2, CLDN8, TMEM116, HS3ST6, CRISPLD1, ID4, POSTN, ZBTB20, SOX5, RORC, MYH11, DACH1, APOC1, RNASE4, IGFBP5, FADS2, C1QTNF7, PRLR, PPFIBP1, ELOVL3, SLC2A13, LPHN3, CYP4B1, IL37, DST, CLDN1, ENPP5, STXBP6, UBE2QL1, FAR2, MSMB, CCND1, ISM1, PIK3C2G, TPPP, FAM189A2, MTURN, UST, SORBS2, APOE, GATA6, RAB3B, GPRASP1, SNTB1, SYBU, IGFBP6, CCL27, JADE1, HSD11B1                                                                                                                                                                                                                                                                                                                                                                                                                                                                                                                                                                                                                                                                                                                                                                                                                                                                                                                                                                                                                                                                                                                                                                                                                                                                                                                                                                                                                                                                                                                                                                                                                                   |

DEGs, differently expressed genes.
